# Supplementary material for: Isolation and identification of a new strain of nervous necrosis virus from the big-belly seahorse Hippocampus abdominalis
Source: PubMed Central journal article supplement (PMC9235245; doi:10.1186/s12985-022-01837-8), 2022-06-27
Supplement: 12985_2022_1837_MOESM1_ESM.pdf [file 12985_2022_1837_MOESM1_ESM.pdf]

**Isolation and identification of a new strain of nervous necrosis virus  
from the big-belly seahorse *Hippocampus abdominalis* in China**

**Supplementary material**

Sequence S1. Nucleotide sequence of SHNNV-*cp* gene

ATGGTACGCAAAGGTGAGAAGAAATTGGCAAAACACGCGACCACCAAGGCCGCGAAT  
CCGCAACCCCGCCGACGTGCTAACAATCGTCGGCGTAGTAACCGCACTGACGCACCTG  
TCTCTAAGGCCTCGACTGTGACTGGATTTGGACGTGGGACCAATGACGTCCATCTCGC  
AGGTATGTCGAGAATCTCCAGGCCGTCCTCCAGCCGGGACAGGAACAGACGGATAC  
GTTGTTGTTGACGCAACCATCGTTCCCGACCTCCTGCCACGACTGGGACACGCTGCTA  
GAATCTTCCAGCGATACGCTGTTGAAACACTGGAGTTTCAAATTGCAATGTGCC  
CGAAACACGGGCGGTGGTTACGTTGCTGGCTTCCTGCCTGATCCAACGACGAT  
CACACCTTCGACGCGCTTCAAGCAACTCGTGGTGCAGTCGTTGCCAAATGGTGGGAA  
AGCAGAACAGTCCGACCTCAGTACACCCGCACGCTCCTCTGGACCTCGTCGGGAAAG  
GAGCAGCGTCTCACGTCACCTGGTCGGCTGATACTCCTGTGTGTCGGCAACAACACTG  
ACGTGGTCAACGTGTCGGTGTGTGTCGCTGGAGTGTTCGACTGAGCGTTCATCTCT  
TGAGACACCTGAAGAGACCACCGCTCCCACCATGACACAAGGTTCCCTGTACAACGAT  
TCCCTTTCCACAAATGACTTCAAGTCCATCCTCCTAGGATCCACGCCACTGGACATTGC  
CCCTGATGGAGCAGTCTTCCAGCTGGACCGTCCGCTGTCCATCGACTACAGCCTTGGA  
ACTGGAGATGTTGACCGTGCTGTTTACTGGCACCTCAAGAAGTTTGCTGGAAATGCTG  
GCACACCTGCAGGCTGGTTTCGCTGGGGCATCTGGGACAACCTCAACAAGACGTTTAC  
AGATGGCGTTGCTTACTACTCTGATGAGCAGCCCCGTCAAATCCTGCTGCCTGTTGGCA  
CTGTCTGCACCAGGGTTGACTCGGAAAATAA

Sequence S2. Amino acid sequence deduced from SHNNV-*cp* mRNA

MVRKGEKKLAKHATTKAANPQPRRRANNRRRSNRTDAPVSKASTVTGFGRGTNDVHLA  
GMSRISQAVLPAGTGTGTYVVVDATIVPDLLPRLGHAARIFQRYAVETLEFEIQPMCPANT  
GGYVAGFLPDPTDNDHTFDALQATRGAVVAKWWESRTVVRPQYTRILLWTSSGKEQRLT  
SPGRLILLCVGNNTDVVNVSVLCRWSVRLSVPSLETPEETTAPTMTQGSLYNDSLSTNDFK  
SILLGSTPLDIAPDGAVFQLDRPLSIDYSLGTGDVDRAVYWHLLKFFAGNAGTPAGWFRWG  
IWDNFKTFTDGVAYYSDEQPRQILLPVGTVCTRVDSEN\*
